# Supplementary material for: The Efficacy of Primavera, a Prevention Programme on Alcohol and Tobacco Use among 10–12-Year-Old Schoolchildren: A Randomized Controlled Cluster Study
Source: MDPI journal article supplement (doi:10.3390/ijerph18083852), 2021-04-07
Supplement: s1 [file s1]

Table S1: Distribution of potential confounders between intervention and control groups at baseline

| Values are numbers (percentages) unless stated otherwise                                           | Primavera group    | Control group      | OR (95%CI)              |
|----------------------------------------------------------------------------------------------------|--------------------|--------------------|-------------------------|
| <i>All subjects</i>                                                                                | 283 (52)           | 265 (48)           |                         |
| <b>Social-economic characteristics</b>                                                             |                    |                    |                         |
| <i>Mean (SD, Median) age</i>                                                                       | 10.60 (0.35) 10.59 | 10.56 (0.40) 10.50 | NA                      |
| <i>Boys</i>                                                                                        | 140 (52)           | 126 (52)           | 1.01 [0.71-1.43]        |
| <i>Individual bedroom</i>                                                                          | 213 (77)           | 190 (73)           | 1.21 [0.82-1.79]        |
| <i>Two cars or more in the household</i>                                                           | 172 (61)           | 143 (55)           | 1.31 [0.93-1.85]        |
| <i>Trip abroad during the last holiday</i>                                                         | 152 (55)           | 158 (61)           | 0.77 [0.55-1.09]        |
| <b>Hobbies</b>                                                                                     |                    |                    |                         |
| <i>Reading out-of-school books</i>                                                                 | 210 (75)           | 204 (79)           | 0.82 [0.55-1.23]        |
| <i>Outings to parks and museums</i>                                                                | 174 (63)           | 184 (72)           | <b>0.66 [0.46-0.95]</b> |
| <i>Playing upon an instrument of music</i>                                                         | 47 (17)            | 51 (20)            | 0.82 [0.53-1.26]        |
| <i>Doing out-of-school sports</i>                                                                  | 201 (78)           | 170 (75)           | 1.22 [0.80-1.87]        |
| <i>Playing video games (on computer, console or phones)</i>                                        | 268 (99)           | 239 (98)           | 1.40 [0.37-5.72]        |
| <b>Time spent watching screens during (TV, videos, "You tube" or similar devises, DVD...)</b>      |                    |                    |                         |
| <i>No more than 2 hours spent watching screens during the week</i>                                 | 195 (70)           | 200 (77)           | 0.70 [0.48-1.03]        |
| <i>No more than 2 hours spent watching screens during the week-end</i>                             | 123 (44)           | 151 (58)           | <b>0.57 [0.41-0.80]</b> |
| <b>Self-perception on school results</b>                                                           |                    |                    |                         |
| <i>"The teacher finds good or very good my school results compared to those of my schoolmates"</i> | 213 (77)           | 174 (67)           | <b>1.64 [1.13-2.41]</b> |
| <b>Bullying in school</b>                                                                          |                    |                    |                         |
| <i>Never bullied in last 2 months or only happened once or twice</i>                               | 217 (80)           | 218 (83)           | 0.81 [0.52-1.26]        |
| <b>Family habits</b>                                                                               |                    |                    |                         |
| <i>Having a parent using tobacco</i>                                                               | 173 (62)           | 139 (56)           | 1.30 [0.92-1.85]        |
| <i>Having a parent using alcohol</i>                                                               | 227 (82)           | 179 (71)           | <b>1.82 [1.21-2.74]</b> |
| <i>Talking about tobacco at home with his/her parents</i>                                          | 55 (20)            | 59 (22)            | 0.86 [0.57-1.30]        |
| <i>Talking about alcohol at home with his/her parents</i>                                          | 53 (19)            | 54 (21)            | 0.92 [0.60-1.41]        |
| <i>Talking about tobacco at home with a brother or a sister</i>                                    | 15 (5)             | 22 (8)             | 0.63 [0.31-1.23]        |
| <i>Talking about alcohol at home with a brother or a sister</i>                                    | 18 (7)             | 20 (8)             | 0.84 [0.43-1.62]        |
| <b>Remembering having received a prevention intervention</b>                                       |                    |                    |                         |
| <i>Remembering having received information in school about alcohol</i>                             | 42 (15)            | 31 (12)            | 1.32 [0.80-2.18]        |
| <i>Remembering having received information in school about tobacco</i>                             | 41 (15)            | 28 (11)            | 1.45 [0.87-2.44]        |
| <i>Remembering having received information in school about another substance</i>                   | 35 (13)            | 30 (11)            | 1.12 [0.67-1.90]        |

Table S2: Distribution of potential confounders between intervention and control groups at 6 months from the start of the interventions (follow-up time point 1)

| Values are numbers (percentages) unless stated otherwise                                      | Primavera group    | Control group      | OR (95%CI)              |
|-----------------------------------------------------------------------------------------------|--------------------|--------------------|-------------------------|
| All subjects                                                                                  | 273(52)            | 255(48)            |                         |
| <b>Social-economic characteristics</b>                                                        |                    |                    |                         |
| Mean (SD, Median) age                                                                         | 11.00 (0.40) 11.00 | 10.95 (0.36) 10.92 | NA                      |
| Boys                                                                                          | 126 (48)           | 122 (49)           | 0.96 [0.67-1.35]        |
| Individual bedroom                                                                            | 216 (80)           | 186 (74)           | 1.37 [0.91-2.07]        |
| Two cars or more in the household                                                             | 186 (68)           | 158 (62)           | 1.29 [0.91-1.86]        |
| Trip abroad during the last holiday                                                           | 152 (57)           | 156 (61)           | 0.82 [0.58-1.17]        |
| <b>Hobbies</b>                                                                                |                    |                    |                         |
| Reading out-of-school books                                                                   | 192 (71)           | 197 (78)           | 0.71 [0.48-1.06]        |
| Outings to parks and museums                                                                  | 184 (69)           | 201 (80)           | <b>0.60 [0.38-0.85]</b> |
| Playing upon an instrument of music                                                           | 40 (15)            | 51 (20)            | 0.69 [0.44-1.09]        |
| Doing out-of-school sports                                                                    | 187 (78)           | 177 (78)           | 1.00 [0.65-1.54]        |
| Playing video games (on computer, console or phones)                                          | 255 (98)           | 234 (98)           | 0.91 [0.26-3.05]        |
| <b>Time spent watching screens during (TV, videos, "You tube" or similar devises, DVD...)</b> |                    |                    |                         |
| No more than 2 hours spent watching screens during the week                                   | 173 (64)           | 188 (74)           | <b>0.64 [0.44-0.92]</b> |
| No more than 2 hours spent watching screens during the week-end                               | 176 (65)           | 181 (71)           | 0.76 [0.52-1.09]        |
| <b>Self-perception on school results</b>                                                      |                    |                    |                         |
| "The teacher finds good or very good my school results compared to those of my schoolmates"   | 217 (81)           | 183 (72)           | <b>1.63 [1.08-2.46]</b> |
| <b>Bullying in school</b>                                                                     |                    |                    |                         |
| Never bullied in last 2 months or only happened once or twice                                 | 222 (83)           | 209 (82)           | 1.04 [0.66-1.63]        |
| <b>Family habits</b>                                                                          |                    |                    |                         |
| Having a parent using tobacco                                                                 | 160 (60)           | 141 (56)           | 1.18 [0.83-1.67]        |
| Having a parent using alcohol                                                                 | 204 (76)           | 178(71)            | 1.33 [0.90-1.97]        |
| Talking about tobacco at home with his/her parents                                            | 86 (32)            | 65 (26)            | 1.37 [0.94-2.02]        |
| Talking about alcohol at home with his/her parents                                            | 72 (27)            | 47 (18)            | <b>1.62 [1.07-2.46]</b> |
| Talking about tobacco at home with a brother or a sister                                      | 24 (9)             | 25 (10)            | 0.89 [0.49-1.61]        |
| Talking about alcohol at home with a brother or a sister                                      | 24 (9)             | 21 (8)             | 1.09 [0.59-2.02]        |
| <b>Remembering having received a prevention intervention</b>                                  |                    |                    |                         |
| Remembering having received information in school about alcohol                               | 140 (58)           | 97 (38)            | <b>2.21 [1.54-3.17]</b> |
| Remembering having received information in school about tobacco                               | 150 (62)           | 97 (39)            | <b>2.60 [1.81-3.75]</b> |
| Remembering having received information in school about another substance                     | 124 (51)           | 78 (32)            | <b>2.22 [1.54-3.21]</b> |

Table S3: Distribution of potential confounders between intervention and control groups at 18 months from the start of the interventions (follow-up time point 2)

| Values are numbers (percentages) unless stated otherwise                                      | Primavera group    | Control group      | OR (95%CI)               |
|-----------------------------------------------------------------------------------------------|--------------------|--------------------|--------------------------|
| All subjects                                                                                  | 197(55)            | 163(45)            |                          |
| <b>Social-economic characteristics</b>                                                        |                    |                    |                          |
| Mean (SD, Median) age                                                                         | 12.04 (0.36) 12.08 | 11.97 (0.34) 12.00 | NA                       |
| Boys                                                                                          | 90 (47)            | 80 (51)            | 0.86 [0.56-1.31]         |
| Individual bedroom                                                                            | 154 (78)           | 133 (82)           | 0.81 [0.48-1.36]         |
| Two cars or more in the household                                                             | 132 (67)           | 102 (63)           | 1.23 [0.80-1.91]         |
| Trip abroad during the last holiday                                                           | 124 (63)           | 103 (63)           | 1.00 [0.65-1.54]         |
| <b>Hobbies</b>                                                                                |                    |                    |                          |
| Reading out-of-school books                                                                   | 109 (57)           | 101 (62)           | 0.78 [0.51-1.20]         |
| Outings to parks and museums                                                                  | 135 (70)           | 114 (70)           | 0.96 [0.61-1.52]         |
| Playing upon an instrument of music                                                           | 28 (14)            | 35 (22)            | 0.60 [0.35-1.04]         |
| Doing out-of-school sports                                                                    | 122 (71)           | 104 (71)           | 0.99 [0.61-1.60]         |
| Playing video games (on computer, console or phones)                                          | 183 (97)           | 149 (99)           | 0.41 [0.06-1.81]         |
| <b>Time spent watching screens during (TV, videos, "You tube" or similar devises, DVD...)</b> |                    |                    |                          |
| No more than 2 hours spent watching screens during the week                                   | 123 (63)           | 96 (59)            | 1.17 [0.77-1.80]         |
| No more than 2 hours spent watching screens during the week-end                               | 105 (54)           | 87 (53)            | 1.02 [0.67-1.55]         |
| <b>Self-perception on school results</b>                                                      |                    |                    |                          |
| "The teacher finds good or very good my school results compared to those of my schoolmates"   | 117 (59)           | 99 (61)            | 0.95 [0.62-1.44]         |
| <b>Bullying in school</b>                                                                     |                    |                    |                          |
| Never bullied in last 2 months or only happened once or twice                                 | 159 (84)           | 134 (86)           | 0.87 [0.47-1.57]         |
| <b>Family habits</b>                                                                          |                    |                    |                          |
| Having a parent using tobacco                                                                 | 113 (59)           | 77 (48)            | <b>1.60 [1.05-2.44]</b>  |
| Having a parent using alcohol                                                                 | 156 (82)           | 118 (73)           | <b>1.67 [1.01-2.80]</b>  |
| Talking about tobacco at home with his/her parents                                            | 56 (29)            | 43 (27)            | 1.12 [0.70-1.79]         |
| Talking about alcohol at home with his/her parents                                            | 48 (25)            | 46 (29)            | 0.83 [0.52-1.33]         |
| Talking about tobacco at home with a brother or a sister                                      | 17 (9)             | 17 (11)            | 0.81 [0.40-1.65]         |
| Talking about alcohol at home with a brother or a sister                                      | 18 (9)             | 15 (9)             | 0.99 [0.48-2.06]         |
| <b>Remembering having received a prevention intervention</b>                                  |                    |                    |                          |
| Remembering having received information in school about alcohol                               | 97 (54)            | 18 (11)            | <b>9.33 [5.38-16.96]</b> |
| Remembering having received information in school about tobacco                               | 90 (50)            | 15 (9)             | <b>9.60 [5.37-18.21]</b> |
| Remembering having received information in school about another substance                     | 63 (34)            | 16 (10)            | <b>4.61 [2.59-8.64]</b>  |
